1 **High sensitivity of a novel rapid test for the diagnosis of clinical and subclinical *Plasmodium***  
2 ***falciparum* infections in a high transmission setting in Burundi**

3  
4 David Niyukuri<sup>1</sup>, Denis Sinzinkayo<sup>1,2</sup>, Emma Troth<sup>3</sup>, Colins Oduma<sup>4</sup>, Mediatrice Barengayabo<sup>1</sup>, Mireille  
5 Ndereyimana<sup>1</sup>, Aurel Holzschuh<sup>3</sup>, Claudia A. Vera-Arias<sup>3</sup>, Yilekal Gebre<sup>3</sup>, Kingsley Badu<sup>5</sup>, Joseph  
6 Nyandwi<sup>1,6</sup>, Dismas Baza<sup>7</sup>, Elizabeth Juma<sup>8</sup>, Cristian Koepfli<sup>3\*</sup>

7  
8 <sup>1</sup> Doctoral School, University of Burundi, Bujumbura, Burundi

9 <sup>2</sup> National Malaria Control Program, Bujumbura, Burundi

10 <sup>3</sup> Eck Institute for Global Health and Department of Biological Sciences, University of Notre Dame, Notre  
11 Dame, USA

12 <sup>4</sup> Kenya Medical Research Institute, Kisumu, Kenya

13 <sup>5</sup> Kwame Nkrumah University of Science and Technology, Kumasi, Ghana

14 <sup>6</sup> National Institute of Public Health, Bujumbura, Burundi

15 <sup>7</sup> WHO Country office, Bujumbura, Burundi

16 <sup>8</sup> WHO African Region, Accra, Ghana

17

18 \*Corresponding author: [ckoepfli@nd.edu](mailto:ckoepfli@nd.edu)

19

20

21 **Abstract**

22 Rapid diagnostic tests (RDTs) are a key tool for the diagnosis of malaria infections among febrile and  
23 subclinical individuals. Low-density infections, and deletions of the *P. falciparum* *hrp2/3* genes (encoding  
24 for the HRP2 and HRP3 proteins detected by many RDTs) present challenges for RDT-based diagnosis.  
25 The novel Rapigen Biocredit three-band *Plasmodium falciparum* HRP2/LDH RDT was evaluated among  
26 444 febrile and 468 subclinical individuals in a high transmission setting in Burundi. Results were  
27 compared to the AccessBio CareStart HRP2 RDT, and qPCR with a sensitivity of <0.1 parasites/ $\mu$ L blood.  
28 Sensitivity among clinical patients was 80.0% (250/313, either of HRP2/LDH positive), compared to  
29 73.2% (229/313) for CareStart ( $P=0.048$ ). Among subclinical infections, sensitivity was 72.3% (162/224)  
30 compared to 58.5% (131/224) for CareStart ( $P=0.003$ ), and reached 88.3% (53/60) in children <15 years.  
31 No (0/362) *hrp2* and 2/366 *hrp3* deletions were observed. In conclusion, the novel RDT showed improved  
32 sensitivity for the diagnosis of *P. falciparum*.

33

## 34 Introduction

35

36 Accurate diagnosis and treatment of malaria infections is a key pillar for control. Over the last decade,  
37 rapid diagnostic tests (RDTs) have become widely used for diagnosis. RDTs are lateral flow devices that  
38 detect parasite-specific proteins by immunohistochemistry. No laboratory infrastructure is required for  
39 RDT use, they can be used with minimal training, and results are available within 10-20 minutes [1, 2].  
40 The sensitivity of RDTs for the diagnosis of clinical cases is similar or better than light microscopy, the  
41 only other method for diagnosis in health centers. RDTs are used in many peripheral health centers  
42 where microscopy is not available, and by community health workers. In 2020, nearly 300 million RDTs  
43 were used by malaria control programs [3].

44

45 In addition to clinical infections diagnosed at health centers, subclinical infections present a major  
46 challenge for transmission. While not causing febrile illness, subclinical infections can result in more  
47 subtle health impacts, e.g. anemia [4]. Using different approaches, several studies found that over 50% of  
48 transmission originates from asymptomatic infections [5-7]. A study conducted in western Kenya  
49 estimated 95% of transmission stemming from subclinical carriers [8]. RDTs are the key diagnostic tool  
50 for strategies to target the subclinical reservoir, for example through active [9, 10] or reactive case  
51 detection [11, 12],

52

53 Among clinical and subclinical infections, a proportion of infections are below the limit of detection of  
54 RDTs and remain untreated. These untreated infections might result in extended periods of illness, and  
55 sustain onward transmission. More sensitive RDTs might be needed to achieve further gains in malaria  
56 control and elimination.

57

58 Apart from low parasite density, deletions of the *hrp2* and *hrp3* genes are a threat to diagnosis by RDT.  
59 The most sensitive RDTs for *P. falciparum* detect the HRP2 and HRP3 proteins. Deletions of these genes  
60 have been initially described in Peru [13] and later in multiple countries, and result in false-negative RDTs  
61 even when parasite density is high. In Africa, deletions are particularly prevalent around the Horn of Africa

62 [14-16], and have been described in multiple other countries, e.g. the Democratic Republic of Congo [17],  
63 and Ghana [18]. Alternative diagnostic targets include Plasmodium Lactate Dehydrogenase (pLDH) or  
64 Aldolase. These proteins are essential and thus genes cannot be deleted, but sensitivity of diagnosis is  
65 lower compared to HRP2 [19]. The WHO recommends regular surveillance of *hrp2/hrp3* deletion to select  
66 the optimal tool for diagnosis [20].

67  
68 Burundi experiences among the highest levels of malaria transmission globally [21, 22]. In contrast to the  
69 trend in many other countries in sub-Saharan Africa, the number of cases has increased in the last two  
70 decades [22]. The increase was observed despite an increase in the number of health centers offering  
71 diagnosis and treatment, and increase in testing, and roll-out of interventions such as bed nets and indoor  
72 residual spraying (IRS) [22]. To understand the benefit a novel, highly sensitive RDT, suspected febrile  
73 cases presenting to a health center, and subclinical community members were tested by the novel RDT,  
74 an established RDT, and results compared to highly sensitive qPCR. *P. falciparum* positive infections  
75 were typed for *hrp2* and *hrp3* deletions.

76

77

## 78 **Study Population and Methods**

79

### 80 **Ethical approval**

81 Informed written consent was collected from each individual, or, in the case of minors, from the legal  
82 guardian prior to sample collection. This study was approved by the Comité National d'Ethique pour la  
83 protection des êtres humains sujets de la recherche biomédicale et comportementale of Burundi  
84 (approval no. CNE/03/2021), and the University of Notre Dame Institutional Review Board (approval no.  
85 21-02-6446).

86

### 87 **Rapid diagnostic tests**

88 The Biocredit Malaria Ag Pf (pLDH/HRPII) RDT, manufactured by Rapigen, contains two test bands, one  
89 for HRP2 and one for LDH, in addition to the control band. Plasmodium Lactate Dehydrogenase (pLDH)

90 is an enzyme of the glycolytic pathway and essential for the parasite. Histidine Rich Protein 2 and 3 are  
91 highly expressed proteins. Their function is not well understood [2]. Deletions of the *hrp2* and *hrp3* genes  
92 result in false-negative RDTs.

93 Given the separated HRP2 and LDH bands, the test can be used for surveillance of possible *hrp2*  
94 deletion. Differences in sensitivity of HRP2 and LDH can be studied using a single test. This test meets  
95 critical WHO criteria and is currently undergoing WHO prequalification [23].

96  
97 As comparison, the AccessBio CareStart Malaria Pf (HRP2) RDT was used. This HRP2-based RDT has  
98 been in use for approximately ten years [24-26]. It is the main RDT used by health systems in multiple  
99 African countries [18, 27].

100

#### 101 **Sample collection and RDT diagnosis**

102 Burundi experiences high, year-round transmission of *P. falciparum* malaria with moderate seasonality.  
103 Samples were collected in Cibitoke Province in northwestern Burundi. Cibitoke Province borders Rwanda  
104 and the Democratic Republic of Congo (DRC). Samples were collected during the dry, lower transmission  
105 season in June 2021. Clinical samples were collected in health centers. All patients presenting for malaria  
106 diagnosis were invited to join the study. Subclinical samples were collected on a market, with all  
107 individuals present invited to join the study. Demographic data of study participants are given in Table 1.  
108 Due to the convenience sampling strategy, the study population does not represent the general  
109 population. Only 27/468 subclinical individuals were children below 5 years of age, and only 73/468 were  
110 children aged 5-15 years. The majority of those sampled were female.

111

112

113

114

115

116

117

118

| Clinical    |        | N   | Test positivity by qPCR |       | P     | Test positivity by RDT |        | P     | RDT sensitivity | P |
|-------------|--------|-----|-------------------------|-------|-------|------------------------|--------|-------|-----------------|---|
| Age group   | 0-5    | 158 | 62.0%                   | 0.002 | 0.002 | 49.4%                  | <0.001 | 72.4% | <0.001          |   |
|             | 5-15   | 99  | 82.8%                   |       |       | 86.9%                  |        | 96.3% |                 |   |
|             | >15    | 187 | 71.1%                   |       |       | 58.3%                  |        | 75.2% |                 |   |
| Gender      | Male   | 181 | 67.4%                   | 0.236 | 0.236 | 62.7%                  | 0.514  | 82.0% | 0.460           |   |
|             | Female | 263 | 72.6%                   |       |       | 59.7%                  |        | 78.5% |                 |   |
| Subclinical |        | N   | Prevalence by qPCR      |       | P     | Prevalence by RDT      |        | P     | RDT sensitivity | P |
| Age group   | 0-5    | 27  | 51.8%                   | 0.015 | 0.015 | 55.6%                  | <0.001 | 78.6% | 0.003           |   |
|             | 5-15   | 73  | 63.0%                   |       |       | 67.1%                  |        | 91.3% |                 |   |
|             | >15    | 368 | 44.7%                   |       |       | 36.8%                  |        | 66.5% |                 |   |
| Gender      | Male   | 217 | 50.7%                   | 0.272 | 0.272 | 39.6%                  | 0.158  | 75.5% | 0.303           |   |
|             | Female | 250 | 45.6%                   |       |       | 46.1%                  |        | 69.3% |                 |   |

119

120 **Table 1:** Demographics of study population and risk factors for infection (by qPCR and RDT). For RDT data, results  
 121 from the Biocredit test were included, with either band (HRP2 or LDH) positive counting as a positive test. Test  
 122 positivity and prevalence by RDT includes individuals that were RDT positive but qPCR negative, resulting in higher  
 123 test positivity or prevalence by RDT than qPCR in some groups. RDT sensitivity is calculated as proportion of RDT  
 124 positive individuals among those positive by qPCR.

125

126 Approximately 200  $\mu$ L blood was collected by finger prick into EDTA tubes. Two RDTs were run on site.  
 127 Remaining blood was stored at -20°C until DNA extraction.

128

### 129 ***P. falciparum* qPCR and *hrp2/3* deletion typing**

130 DNA was extracted using the Macherey-Nagel NucleoMag Blood 200  $\mu$ L kit according to manufacturer's  
 131 instructions. This kit yields very high DNA recovery, resulting in a low limit of detection [28]. DNA was  
 132 extracted from 200  $\mu$ L blood and eluted in 100  $\mu$ L elution buffer. qPCR was done in a total volume of 12  
 133  $\mu$ L, including 2  $\mu$ L DNA, corresponding to 4  $\mu$ L blood. The *P. falciparum* varATS assay was used. This  
 134 assay targets a multicopy gene that is present in approximately 60 copies per parasite, of which  
 135 approximately 20 copies are amplified with the primers and probe used. It thus offers very high sensitivity  
 136 of <0.1 parasites/ $\mu$ L blood [29]. For absolute quantification of parasite density, a standard curve derived  
 137 from DNA from cultured 3D7 parasites and quantified by droplet digital PCR (ddPCR) was run along

138 samples. Samples positive for *P. falciparum* at a density of approximately >5 parasites/ $\mu$ L were typed for  
139 *hrp2* and *hrp3* deletion by ddPCR [30].

140

## 141 Data analysis

142 As parasite density distributions were skewed, geometric mean densities are given whenever densities  
143 are reported. To determine the limit of detection (LoD) of each RDT target, logistic regression analysis  
144 was conducted. LoD was defined as the lowest parasite density where a qPCR-positive infection would  
145 be detected with 95% probability. CI95 = 95% confidence interval.

146

147

## 148 Results

### 149 RDT sensitivity and specificity

150 444 febrile patients presenting to a health center were enrolled. By qPCR, *P. falciparum* positivity was  
151 70.5% (313/444). Mean parasite density by qPCR was 727.4 parasites/ $\mu$ L (CI95: 405.9, 1303.6).  
152 Counting either band (HRP2 or LDH) positive, the sensitivity of the Biocredit RDT was 79.9% (250/313 of  
153 infections detected, Figure 1A, Table 2). 23 individuals tested positive by RDT, but negative by qPCR,  
154 resulting in a specificity of 82.4%.

|                    | LoD<br>[parasites/ $\mu$ L] | Clinical    |             | Subclinical |             |
|--------------------|-----------------------------|-------------|-------------|-------------|-------------|
|                    |                             | Sensitivity | Specificity | Sensitivity | Specificity |
| Biocredit any band | 34                          | 79.9%       | 82.4%       | 72.3%       | 84.4%       |
| Biocredit HRP2     | 42                          | 77.6%       | 90.1%       | 71.0%       | 88.1%       |
| Biocredit LDH      | 290                         | 71.9%       | 91.6%       | 50.0%       | 93.4%       |
| CareStart HRP2     | 178                         | 73.2%       | 96.2%       | 58.5%       | 93.4%       |

155

156 **Table 2:** Sensitivity, specificity, and limit of detection of RDTs.

157

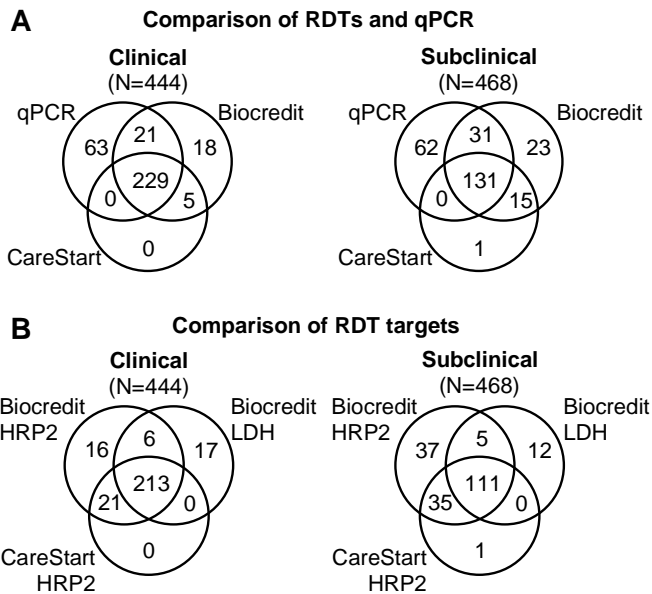

158

159 **Figure 1:** Correspondence among qPCR, and different RDTs and RDT targets. For panel A, when either band on the  
 160 Biocredit RDT was positive it was recorded as positive. Panel B includes false-positive RDTs that were negative by  
 161 qPCR.

162

163 Among 468 subclinical individuals enrolled, 47.9% (224/468) were positive by qPCR. Mean parasite  
 164 density was 22.9 parasites/ $\mu$ L (CI95: 13.1, 40.3). The sensitivity of the Biocredit test was 72.3% (162/238,  
 165 Figure 1A, Table 2). 38 individuals were positive by RDT but negative by qPCR, resulting in a specificity  
 166 of 84.4% (194/230).

167

168 The novel Biocredit RDT was compared against the CareStart RDT, an established product routinely  
 169 used in multiple countries (Figure 1A). The CareStart RDT showed a sensitivity of 73.2% (229/313)  
 170 among clinical individuals and thus was slightly less sensitive than the Biocredit RDT with a sensitivity of  
 171 79.9% ( $P < 0.001$ , Table 2). Five individuals tested positive by CareStart RDT but negative by qPCR,  
 172 resulting in a specificity of 96.2%. Among subclinical individuals, sensitivity of the CareStart was 58.5%  
 173 (131/224), and thus substantially lower than the Biocredit at 72.3%. Specificity was 93.4% (228/244,  
 174  $P < 0.001$ , Table 2).

175



176 On the Biocredit RDT, the HRP2 band was more sensitive than the LDH band (Figure 1B). Among clinical  
177 individuals, sensitivity of HRP2 was 77.6% (243/313), compared to 71.9% (225/313) for the LDH band  
178 ( $P < 0.001$ , Table 2). Specificity was 90.1% (118/131) for HRP2, and 91.6% (120/131) for LDH (Table 2).  
179 Among subclinical individuals, the difference in sensitivity between HRP2 and LDH was more pronounced  
180 than among clinical infections. Sensitivity of HRP2 was 71.0% (159/224), compared to 50.0% (112/224)  
181 for LDH ( $P < 0.001$ , Table 2). Specificity for HRP2 only was 88.1% (215/244), and for LDH only it was  
182 93.4% (214/230, Table 2). Low correspondence between false-positive HRP2 and LDH bands was  
183 observed. Among 61 false-positive RDTs (clinical and subclinical combined), only 8 were false-positive for  
184 both targets, 34 were positive for HRP2 only, and 19 for LDH only.  
185  
186 The LoD, defined as the lowest parasite density that could be detected with 95% probability, was 34  
187 parasites/ $\mu$ L (CI<sub>95</sub> 17, 82) for the Biocredit RDT (any band), 42 parasites/ $\mu$ L (CI<sub>95</sub> 22, 96) for the  
188 Biocredit HRP2 band, 290 parasites/ $\mu$ L (CI<sub>95</sub> 159, 617) for the Biocredit LDH band, and 178 parasites/ $\mu$ L  
189 (CI<sub>95</sub> 94, 399) for CareStart (Table 2, Figure 2).

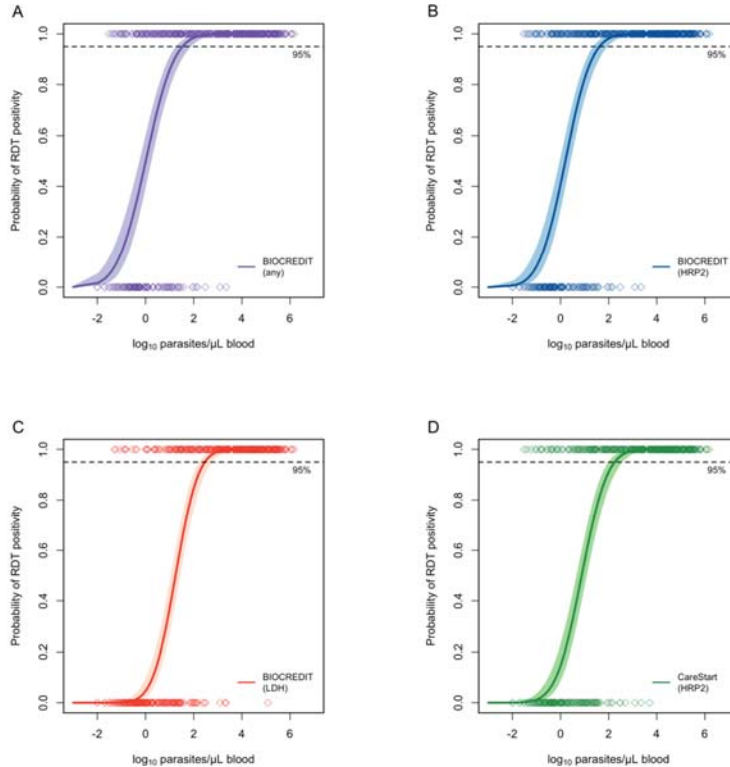

190

191 **Figure 2:** Limit of Detection (LoD) of each RDT and RDT target in relation to parasite density. Parasite density (by  
192 qPCR) of RDT positive and RDT negative samples is shown along the top and bottom X-axis. Shaded lines show  
193 95% confidence intervals. A) Biocredit (any band) B) Biocredit HRP2 C) Biocredit LDH D) CareStart HRP2

194

### 195 ***hrp2/3* deletion typing**

196 362 *P. falciparum* positive samples were successfully typed for *hrp2* deletion, and 366 were successfully  
197 typed for *hrp3* deletion. No *hrp2* deletions were observed. Two samples carried *hrp3* deletion, one each  
198 collected from a clinical and subclinical patient. The subclinical individual was negative by all RDTs at a  
199 density of 39 parasites/ $\mu$ L by ddPCR. The clinical individual was RDT positive at a density of 136,000  
200 parasites/ $\mu$ L.

201

### 202 **Demographic risk factors for infection**

203 Prevalence of subclinical infection, and test positivity rate peaked in children aged 5 to 15 years, both by  
204 qPCR and RDT (Table 1). Parasite densities decreased with age in clinical and subclinical infections  
205 (clinical: 9.7% decrease per year,  $P<0.001$ ; subclinical: 4.6% decrease per year,  $P=0.003$ ). As a result,  
206 RDT sensitivity tended to be higher in children than adults. Among clinical infections, sensitivity of the  
207 Biocredit RDT (any band) was 83.3% (150/180) in children below 15 years compared to 75.2% (100/133)  
208 in adults aged 15 and older ( $P=0.076$ ). Among subclinical infections, sensitivity was 88.3% (53/61) in  
209 children and 66.5% (109/164) in adults ( $P=0.001$ ).

210

211 No significant differences were observed between men and women in prevalence by qPCR or RDT, or  
212 RDT sensitivity (Table 1).

213

214

### 215 **Discussion**

216

217 This study found high sensitivity of a novel RDT for the diagnosis of *P. falciparum* infections in clinical and  
218 subclinical individuals in highly endemic setting in Burundi. Using a highly sensitive qPCR with a limit of

219 detection of <0.1 parasites/ $\mu$ L blood as gold standard, the RDT detected 80% of clinical and 72% of  
220 subclinical infections. The novel RDT performed substantially better compared to an established product  
221 that is used by malaria control programs in multiple countries.

222  
223 Children are at highest risk of severe malaria, and in high transmission settings they are an important  
224 reservoir of transmission. The convenience sampling on a market resulted in an underrepresentation of  
225 children among subclinical individuals, with only 21% (100/468) study participants being below 15 years  
226 of age, compared to approximately 45% in the general population [31]. In the small group of 61 children  
227 that were positive by qPCR, the Biocredit RDT detected 88% of infections. Testing a group with an age  
228 distribution more representative of the general population, it is expected that the overall sensitivity of the  
229 RDT would be even higher than the 72% measured in the present study.

230  
231 Compared to the established CareStart RDT, the LoD (defined as the parasite density where the  
232 probability of a positive RDT is 95%) of the Biocredit RDT was 5-fold lower. The LoD of the Biocredit  
233 HRP2-band only was 4-fold lower compared to the CareStart RDT, and the LoD of the Biocredit LDH-  
234 band only was moderately higher than the one of the CareStart. Of note, differences in the protocols used  
235 for DNA extraction [28], and in the external standards used for qPCR [32], result in pronounced  
236 differences in parasite quantification. Results from different studies are thus not directly comparable. We  
237 extracted DNA from whole blood and used an extraction protocol that yielded fourfold more DNA than  
238 another common protocol. Further, extraction from whole blood yielded tenfold more DNA than from DBS  
239 [28]. Using these protocols resulted in high DNA recovery, and thus in higher LoDs.

240  
241 No *hrp2* deletions were detected in the study population. Differences in the number of tests positive by  
242 LDH and HRP2 are thus fully caused by differences in the LoD of these targets. On the Biocredit RDT,  
243 HRP2 was substantially more sensitive than LDH. Where no deletions are present, HRP2-based RDTs  
244 remain the most sensitive diagnostic target for RDTs. Among clinical infections, sensitivity of the Biocredit  
245 LDH band was very similar to the AccessBio HRP2-based RDT (72% vs. 73%). Countries that switch to

246 non-HRP2-based RDTs due to high levels of deletion can expect similar sensitivity of diagnosis in clinical  
247 settings using the new test as with previous HRP2-based RDTs.

248  
249 A high rate of false-positive RDTs was observed, and consequently a relatively low specificity. Antigens  
250 can persist after parasite clearance [33], though LDH levels were shown to follow parasite density closely  
251 [33]. Antigens persisting after treatment were shown to be a major cause of false-positive RDTs [34].  
252 Recent treatment was not assessed in this study, thus this factor could not be assessed as cause for  
253 false-positive RDTs. False-positive RDTs can also be the result of non-*Plasmodium* infections [35, 36]  
254 and non-infectious diseases [37]. Most false-positive Biocredit RDTs were positive by one target only,  
255 either HRP2 or LDH. Using an RDT with two bands reduces specificity compared to a single-target test.

256  
257 Half of the population in the study site in Burundi's north-west carried subclinical *P. falciparum* infections.  
258 These individuals are expected to be an important source of transmission [5-8]. Interventions targeting  
259 the asymptomatic reservoir might be needed to reduce transmission. The high sensitivity of the Biocredit  
260 RDT to diagnose subclinical infections opens up new avenues for malaria control, e.g. through mass  
261 screen and treat campaigns. Given the absence of *hrp2* deletions, HRP2-based diagnostic remains  
262 appropriate in the site of the current study. Surveillance for *hrp2* and *hrp3* deletions will be required in  
263 other sites across Burundi.

264  
265 In conclusion, the Biocredit RDT offers high sensitivity for the diagnosis of clinical and subclinical  
266 infections. Parasite density distributions differ across transmission intensities, and more subpatent  
267 infections are generally observed as transmission declines [38, 39]. Studies in regions of medium and low  
268 transmission will be required to determine sensitivity and specificity in these populations.

269

## 270 **Acknowledgements**

271 We thank all study participants and field teams.

272

## 273 **Funding**

274 This work was supported by the National Institutes of Health grant R21AI137891. The funders  
275 had no role in study design, data analysis, decision to publish, or preparation of the manuscript.

276 **References**

- 277 1. World Health Organisation. How malaria RDTs work. Available from:  
278 [https://www.who.int/teams/global-malaria-programme/case-management/diagnosis/rapid-](https://www.who.int/teams/global-malaria-programme/case-management/diagnosis/rapid-diagnostic-tests/how-malaria-rdts-work)  
279 [diagnostic-tests/how-malaria-rdts-work](https://www.who.int/teams/global-malaria-programme/case-management/diagnosis/rapid-diagnostic-tests/how-malaria-rdts-work).
- 280 2. Poti KE, Sullivan DJ, Dondorp AM, Woodrow CJ. HRP2: Transforming Malaria Diagnosis,  
281 but with Caveats. Trends Parasitol. 2020;36(2):112-26. Epub 2019/12/19. doi:  
282 10.1016/j.pt.2019.12.004. PubMed PMID: 31848119.
- 283 3. World Health Organisation. World malaria report 2021. Geneva: 2021.
- 284 4. de Mast Q, Brouwers J, Syafruddin D, Bousema T, Baidjoe AY, de Groot PG, et al. Is  
285 asymptomatic malaria really asymptomatic? Hematological, vascular and inflammatory effects  
286 of asymptomatic malaria parasitemia. J Infection. 2015;71(5):587-96. doi:  
287 10.1016/j.jinf.2015.08.005. PubMed PMID: WOS:000368479700011.
- 288 5. Goncalves BP, Kapulu MC, Sawa P, Guelbeogo WM, Tiono AB, Grignard L, et al.  
289 Examining the human infectious reservoir for Plasmodium falciparum malaria in areas of  
290 differing transmission intensity. Nat Commun. 2017;8(1):1133. Epub 2017/10/28. doi:  
291 10.1038/s41467-017-01270-4. PubMed PMID: 29074880; PubMed Central PMCID:  
292 PMC5658399.
- 293 6. Ouedraogo AL, Goncalves BP, Gneme A, Wenger EA, Guelbeogo MW, Ouedraogo A, et  
294 al. Dynamics of the Human Infectious Reservoir for Malaria Determined by Mosquito Feeding  
295 Assays and Ultrasensitive Malaria Diagnosis in Burkina Faso. J Infect Dis. 2016;213(1):90-9. Epub  
296 2015/07/05. doi: 10.1093/infdis/jiv370. PubMed PMID: 26142435.

- 297 7. Tadesse FG, Slater HC, Chali W, Teelen K, Lanke K, Belachew M, et al. The Relative  
298 Contribution of Symptomatic and Asymptomatic Plasmodium vivax and Plasmodium falciparum  
299 Infections to the Infectious Reservoir in a Low-Endemic Setting in Ethiopia. Clin Infect Dis.  
300 2018;66(12):1883-91. Epub 2018/01/06. doi: 10.1093/cid/cix1123. PubMed PMID: 29304258.
- 301 8. Sumner KM, Freedman E, Abel L, Obala A, Pence BW, Wesolowski A, et al. Genotyping  
302 cognate Plasmodium falciparum in humans and mosquitoes to estimate onward transmission of  
303 asymptomatic infections. Nat Commun. 2021;12(1):909. Epub 2021/02/12. doi:  
304 10.1038/s41467-021-21269-2. PubMed PMID: 33568678; PubMed Central PMCID:  
305 PMC7875998.
- 306 9. Scott CA, Yeshiwondim AK, Serda B, Guinovart C, Tesfay BH, Agmas A, et al. Mass testing  
307 and treatment for malaria in low transmission areas in Amhara Region, Ethiopia. Malar J.  
308 2016;15:305. Epub 2016/06/04. doi: 10.1186/s12936-016-1333-3. PubMed PMID: 27255330;  
309 PubMed Central PMCID: PMC4890322.
- 310 10. Samuels AM, Odero NA, Odongo W, Otieno K, Were V, Shi YP, et al. Impact of  
311 Community-Based Mass Testing and Treatment on Malaria Infection Prevalence in a High-  
312 Transmission Area of Western Kenya: A Cluster Randomized Controlled Trial. Clin Infect Dis.  
313 2021;72(11):1927-35. Epub 2020/04/24. doi: 10.1093/cid/ciaa471. PubMed PMID: 32324850.
- 314 11. Stuck L, Fakhri BS, Al-Mafazy AH, Hofmann NE, Holzschuh A, Grossenbacher B, et al.  
315 Malaria infection prevalence and sensitivity of reactive case detection in Zanzibar. Int J Infect  
316 Dis. 2020;97:337-46. Epub 2020/06/14. doi: 10.1016/j.ijid.2020.06.017. PubMed PMID:  
317 32534138.

- 318 12. Searle KM, Katowa B, Musonda M, Pringle JC, Hamapumbu H, Matoba J, et al. Sustained  
319 Malaria Transmission despite Reactive Screen-and-Treat in a Low-Transmission Area of  
320 Southern Zambia. *Am J Trop Med Hyg.* 2020;104(2):671-9. Epub 2020/11/26. doi:  
321 10.4269/ajtmh.20-0947. PubMed PMID: 33236715; PubMed Central PMCID: PMC7866307.
- 322 13. Gamboa D, Ho MF, Bendezu J, Torres K, Chiodini PL, Barnwell JW, et al. A large  
323 proportion of *P. falciparum* isolates in the Amazon region of Peru lack *pfhrp2* and *pfhrp3*:  
324 implications for malaria rapid diagnostic tests. *PLoS One.* 2010;5(1):e8091. Epub 2010/01/30.  
325 doi: 10.1371/journal.pone.0008091. PubMed PMID: 20111602; PubMed Central PMCID:  
326 PMC2810332.
- 327 14. Berhane A, Anderson K, Mihreteab S, Gresty K, Rogier E, Mohamed S, et al. Major Threat  
328 to Malaria Control Programs by *Plasmodium falciparum* Lacking Histidine-Rich Protein 2,  
329 Eritrea. *Emerg Infect Dis.* 2018;24(3):462-70. Epub 2018/02/21. doi: 10.3201/eid2403.171723.  
330 PubMed PMID: 29460730; PubMed Central PMCID: PMC5823352.
- 331 15. Golassa L, Messele A, Amambua-Ngwa A, Swedberg G. High prevalence and extended  
332 deletions in *Plasmodium falciparum* *hrp2/3* genomic loci in Ethiopia. *PLoS One.*  
333 2020;15(11):e0241807. Epub 2020/11/06. doi: 10.1371/journal.pone.0241807. PubMed PMID:  
334 33152025; PubMed Central PMCID: PMC7644029 adherence to PLOS ONE policies on data  
335 or materials sharing.
- 336 16. Iriart X, Menard S, Chauvin P, Mohamed HS, Charpentier E, Mohamed MA, et al.  
337 Misdiagnosis of imported *falciparum* malaria from African areas due to an increased prevalence  
338 of *pfhrp2/pfhrp3* gene deletion: the Djibouti case. *Emerg Microbes Infect.* 2020;9(1):1984-7.



- 339 Epub 2020/09/02. doi: 10.1080/22221751.2020.1815590. PubMed PMID: 32869688; PubMed  
340 Central PMCID: PMCPMC7534257.
- 341 17. Parr JB, Verity R, Doctor SM, Janko M, Carey-Ewend K, Turman BJ, et al. Pfhrrp2-Deleted  
342 Plasmodium falciparum Parasites in the Democratic Republic of the Congo: A National Cross-  
343 sectional Survey. J Infect Dis. 2016. doi: 10.1093/infdis/jiw538. PubMed PMID: 28177502.
- 344 18. Amoah LE, Abankwa J, Oppong A. Plasmodium falciparum histidine rich protein-2  
345 diversity and the implications for PfHRP 2: based malaria rapid diagnostic tests in Ghana. Malar  
346 J. 2016;15:101. Epub 2016/02/20. doi: 10.1186/s12936-016-1159-z. PubMed PMID: 26891848;  
347 PubMed Central PMCID: PMCPMC4759916.
- 348 19. Li B, Sun Z, Li X, Li X, Wang H, Chen W, et al. Performance of pfHRP2 versus pLDH  
349 antigen rapid diagnostic tests for the detection of Plasmodium falciparum: a systematic review  
350 and meta-analysis. Arch Med Sci. 2017;13(3):541-9. Epub 2017/05/17. doi:  
351 10.5114/aoms.2017.67279. PubMed PMID: 28507567; PubMed Central PMCID:  
352 PMCPMC5420633.
- 353 20. World Health Organisation. Response plan to *pfhrp2* gene deletions. Geneva: 2019.
- 354 21. Lok P, Dijk S. Malaria outbreak in Burundi reaches epidemic levels with 5.7 million  
355 infected this year. BMJ. 2019;366:l5104. Epub 2019/08/11. doi: 10.1136/bmj.l5104. PubMed  
356 PMID: 31399412.
- 357 22. Sinzinkayo D, Baza D, Gnanguenon V, Koepfli C. The lead-up to epidemic transmission:  
358 malaria trends and control interventions in Burundi 2000 to 2019. Malar J. 2021;20(1):298.  
359 Epub 2021/07/04. doi: 10.1186/s12936-021-03830-y. PubMed PMID: 34215270; PubMed  
360 Central PMCID: PMCPMC8249825.

- 361 23. World Health Organisation. Selecting and procuring malaria RDTs 2022 [cited 2022 April  
362 12]. Available from: [https://www.who.int/teams/global-malaria-programme/case-](https://www.who.int/teams/global-malaria-programme/case-management/diagnosis/rapid-diagnostic-tests/selection-and-procurement)  
363 [management/diagnosis/rapid-diagnostic-tests/selection-and-procurement](https://www.who.int/teams/global-malaria-programme/case-management/diagnosis/rapid-diagnostic-tests/selection-and-procurement).
- 364 24. Maltha J, Gillet P, Bottieau E, Cnops L, van Esbroeck M, Jacobs J. Evaluation of a rapid  
365 diagnostic test (CareStart Malaria HRP-2/pLDH (Pf/pan) Combo Test) for the diagnosis of  
366 malaria in a reference setting. *Malar J.* 2010;9:171. Epub 2010/06/23. doi: 10.1186/1475-2875-  
367 9-171. PubMed PMID: 20565816; PubMed Central PMCID: PMCPMC2906498.
- 368 25. Moges B, Amare B, Belyhun Y, Tekeste Z, Gizachew M, Workineh M, et al. Comparison of  
369 CareStart HRP2/pLDH COMBO rapid malaria test with light microscopy in north-west Ethiopia.  
370 *Malar J.* 2012;11:234. Epub 2012/07/24. doi: 10.1186/1475-2875-11-234. PubMed PMID:  
371 22818643; PubMed Central PMCID: PMCPMC3411439.
- 372 26. World Health Organisation. Malaria rapid diagnostic test performance: results of WHO  
373 product testing of malaria RDTs: round 8 (2016–2018). Geneva: 2018 978-92-4-151496-5.
- 374 27. Teh RN, Sumbele IUN, Asoba Nkeudem G, Meduke DN, Ojong ST, Kimbi HK. Concurrence  
375 of CareStart Malaria HRP2 RDT with microscopy in population screening for Plasmodium  
376 falciparum infection in the Mount Cameroon area: predictors for RDT positivity. *Trop Med*  
377 *Health.* 2019;47:17. Epub 2019/03/15. doi: 10.1186/s41182-019-0145-x. PubMed PMID:  
378 30867636; PubMed Central PMCID: PMCPMC6397448.
- 379 28. Holzschuh A, Koepfli C. Tenfold difference in DNA recovery rate: systematic comparison  
380 of whole blood vs. dried blood spot sample collection for malaria molecular surveillance. *Malar*  
381 *J.* 2022;21(1):88. Epub 2022/03/17. doi: 10.1186/s12936-022-04122-9. PubMed PMID:  
382 35292038.

- 383 29. Hofmann N, Mwingira F, Shekalaghe S, Robinson LJ, Mueller I, Felger I. Ultra-sensitive  
384 detection of Plasmodium falciparum by amplification of multi-copy subtelomeric targets. PLoS  
385 Med. 2015;12(3):e1001788. Epub 2015/03/04. doi: 10.1371/journal.pmed.1001788. PubMed  
386 PMID: 25734259; PubMed Central PMCID: PMC4348198.
- 387 30. Vera-Arias CA, Holzschuh A, Oduma CO, Badu K, Abdul-Hakim M, Yukich J, et al.  
388 Plasmodium falciparum hrp2 and hrp3 gene deletion status in Africa and South America by  
389 highly sensitive and specific digital PCR. 2021. doi: 10.1101/2021.06.01.21258117.
- 390 31. United Nations Department of Economic and Social Affairs PD. World Population  
391 Prospects 2019, Volume II: Demographic Profiles: Burundi 2019. Available from:  
392 [https://population.un.org/wpp/Graphs/1 Demographic%20Profiles/Burundi.pdf](https://population.un.org/wpp/Graphs/1%20Demographic%20Profiles/Burundi.pdf).
- 393 32. Koepfli C, Nguitragool W, Hofmann NE, Robinson LJ, Ome-Kaius M, Sattabongkot J, et al.  
394 Sensitive and accurate quantification of human malaria parasites using droplet digital PCR  
395 (ddPCR). Sci Rep. 2016;6:39183. Epub 2016/12/17. doi: 10.1038/srep39183. PubMed PMID:  
396 27982132; PubMed Central PMCID: PMC5159915.
- 397 33. Jang IK, Tyler A, Lyman C, Kahn M, Kalnoky M, Rek JC, et al. Simultaneous Quantification  
398 of Plasmodium Antigens and Host Factor C-Reactive Protein in Asymptomatic Individuals with  
399 Confirmed Malaria by Use of a Novel Multiplex Immunoassay. J Clin Microbiol. 2019;57(1). Epub  
400 2018/11/09. doi: 10.1128/JCM.00948-18. PubMed PMID: 30404944; PubMed Central PMCID:  
401 PMC6322473.
- 402 34. Hosch S, Yoboue CA, Donfack OT, Guirou EA, Dangy JP, Mpina M, et al. Analysis of  
403 nucleic acids extracted from rapid diagnostic tests reveals a significant proportion of false  
404 positive test results associated with recent malaria treatment. Malar J. 2022;21(1):23. Epub

- 405 2022/01/26. doi: 10.1186/s12936-022-04043-7. PubMed PMID: 35073934; PubMed Central  
406 PMCID: PMCPMC8785039.
- 407 35. Meatherall B, Preston K, Pillai DR. False positive malaria rapid diagnostic test in  
408 returning traveler with typhoid fever. *BMC Infect Dis.* 2014;14:377. Epub 2014/07/10. doi:  
409 10.1186/1471-2334-14-377. PubMed PMID: 25005493; PubMed Central PMCID:  
410 PMCPMC4094604.
- 411 36. Gatton ML, Ciketic S, Barnwell JW, Cheng Q, Chiodini PL, Incardona S, et al. An  
412 assessment of false positive rates for malaria rapid diagnostic tests caused by non-Plasmodium  
413 infectious agents and immunological factors. *PLoS One.* 2018;13(5):e0197395. Epub  
414 2018/05/15. doi: 10.1371/journal.pone.0197395. PubMed PMID: 29758050; PubMed Central  
415 PMCID: PMCPMC5951549.
- 416 37. Lee JH, Jang JW, Cho CH, Kim JY, Han ET, Yun SG, et al. False-positive results for rapid  
417 diagnostic tests for malaria in patients with rheumatoid factor. *J Clin Microbiol.*  
418 2014;52(10):3784-7. Epub 2014/07/25. doi: 10.1128/JCM.01797-14. PubMed PMID: 25056333;  
419 PubMed Central PMCID: PMCPMC4187788.
- 420 38. Bousema T, Okell L, Felger I, Drakeley C. Asymptomatic malaria infections: detectability,  
421 transmissibility and public health relevance. *Nat Rev Microbiol.* 2014;12(12):833-40. doi:  
422 10.1038/nrmicro3364. PubMed PMID: 25329408.
- 423 39. Koepfli C, Ome-Kaius M, Jally S, Malau E, Maripal S, Ginny J, et al. Sustained Malaria  
424 Control Over an 8-Year Period in Papua New Guinea: The Challenge of Low-Density  
425 Asymptomatic Plasmodium Infections. *J Infect Dis.* 2017;216(11):1434-43. Epub 2017/10/14.

426 doi: 10.1093/infdis/jix507. PubMed PMID: 29029179; PubMed Central PMCID:

427 PMCPMC5853328.

428
